# Supplementary material for: Ethical and clinical challenges in managing low-penetrance CNVs: insights from Portuguese clinical geneticists
Source: Front Genet. 2026 Mar 2;17:1757167. doi: 10.3389/fgene.2026.1757167 (PMC12989213; doi:10.3389/fgene.2026.1757167)
Supplement: Supplementary file 2 [file Table1.xlsx]

## Sheet: Table 4
	Correlation Matrix		Q1	Q2	Q3	Q4	Q5	Q6	Q7	Q8	Q9	Q10	Q11	Q12	Q13	Q14	Q15	Q16	Q17	Q18	Q19	Q20	Q21	Q22	Q23	Q24	Q25	Q26	Q27	Q28	Q29	Q30	Q31	Q32
	Q1	τ
		Sig.
	Q2	τ	0.0314758
		Sig.	0.862763
	Q3	τ	-0.0418899	0.0449552
		Sig.	0.826858	0.809399
	Q4	τ	-0.0817108	-,427*	-0.168803
		Sig.	0.669438	0.0217323	0.389001
	Q5	τ	-0.0664217	,365*	0.103988	0.00533791
		Sig.	0.712524	0.0377411	0.573011	0.976905
	Q6	τ	0.162096	0.2706	,559**	-0.0564488	0.307479
		Sig.	0.403285	0.151646	0.00484121	0.776079	0.0998069
	Q7	τ	-0.236306	-0.254947	-,522**	0.357183	-0.137949	-0.351197
		Sig.	0.18562	0.142456	0.00424676	0.0504565	0.422807	0.0576623
	Q8	τ	0.265263	0.0541499	0.333562	-0.13254	-0.137123	0.260273	-0.197212
		Sig.	0.15625	0.7662	0.0815851	0.488673	0.446892	0.179648	0.269351
	Q9	τ	0.0996734	-0.344828	-0.219156	0.339799	-0.086361	-0.174762	0.0377699	-0.216599
		Sig.	0.584116	0.0517487	0.239652	0.0681154	0.622665	0.354468	0.827983	0.234283
	Q10	τ	-0.0524597	0.231527	0.168582	-0.08769	0.0335848	0.186037	-0.103867	0.0487349	0.00492611
		Sig.	0.773273	0.191527	0.365727	0.637803	0.848241	0.324282	0.550143	0.788996	0.977831
	Q11	τ	0.18949	-0.0721362	0.0768026	0.112359	-0.229509	0	-0.059918	0.174449	0.0865635	-0.168318
		Sig.	0.293063	0.680983	0.677137	0.542193	0.186451	1	0.727661	0.333106	0.621768	0.337416
	Q12	τ	-0.169004	,452**	-0.0877744	-0.0321025	0.323186	0.264171	-0.0737452	-0.0687225	-0.115418	0.293354	-0.0422535
		Sig.	0.348145	0.00995029	0.634019	0.861689	0.0627082	0.157073	0.66807	0.70286	0.510475	0.0943929	0.807697
	Q13	τ	0.230823	0.172414	-0.0618134	-0.043845	0.172722	-0.00563749	-0.118031	0.227429	-0.137931	-0.17734	0.0288545	0.0721362
		Sig.	0.202763	0.328442	0.738941	0.813026	0.32274	0.976055	0.495076	0.209524	0.434329	0.314811	0.868761	0.679408
	Q14	τ	0.206262	-0.0939083	-0.0133906	-0.235078	-0.0457315	-0.0806023	-0.0450014	-0.0193552	0.252379	-0.146732	0.0286492	-0.34379	-0.129124
		Sig.	0.278902	0.612481	0.94526	0.227778	0.803219	0.683216	0.804442	0.919077	0.173415	0.428675	0.875921	0.0608514	0.484021
	Q15	τ	0.3341	0.132355	0.26282	-0.218153	0.0429693	0.173908	-,573**	,361*	0.00980404	-0.0980404	,378*	-0.0239278	0.235297	0.0876085
		Sig.	0.0663186	0.454929	0.158167	0.24115	0.806434	0.356439	0.000966624	0.0472467	0.95586	0.579923	0.0310557	0.891393	0.181961	0.636261
	Q16	τ	0.0935106	0.229279	0.267112	-0.331072	0.11403	0.022331	-,351*	,429*	-,381*	0.0878091	-0.233357	0.209545	,356*	-0.0697474	0.242721
		Sig.	0.605989	0.193919	0.150001	0.0742139	0.514029	0.905398	0.0427524	0.0179761	0.0310909	0.618824	0.181621	0.230128	0.0426279	0.705518	0.168721
	Q17	τ	-0.162926	,372*	0.0498638	-0.145897	0.0585388	0.0875428	-0.0366573	-0.120125	-0.24588	,404*	-0.0693444	0.261375	-0.213096	-0.188794	-0.353423	0.0595204
		Sig.	0.393336	0.0454845	0.798596	0.455037	0.75023	0.658254	0.840469	0.529163	0.185627	0.0295083	0.706034	0.154919	0.249039	0.331399	0.0568995	0.747578
	Q18	τ	0.0317906	-,353*	-0.28378	0.287842	-0.116299	-,393*	0.0572214	-0.273457	,353*	-0.169163	-0.082572	-0.140858	0.303498	0.165983	-0.14358	0.0147812	-0.204189
		Sig.	0.86163	0.0466469	0.128492	0.122888	0.508236	0.0376936	0.742412	0.133834	0.0466469	0.340735	0.638474	0.42264	0.0858966	0.371415	0.418355	0.933365	0.272472
	Q19	τ	0.231226	-0.0310182	,637**	-0.234667	-0.0785473	,575**	-0.344847	,546**	-0.0310182	-0.0434255	0.0605627	-0.205913	0	0.243916	0.179026	0.159729	-0.123858	-0.23183
		Sig.	0.241563	0.871737	0.00163168	0.245484	0.679577	0.0049824	0.0670622	0.00573181	0.871737	0.821176	0.750072	0.278559	1	0.225145	0.351028	0.403649	0.538762	0.228322
	Q20	τ	0.100006	0.0763005	0.0803435	0	0.0228657	0.268674	0.146254	0.212908	-0.0469541	-0.0939083	-0.0515685	0.0916774	0.0586927	0.34965	-0.040884	0.0639351	-0.227855	-0.106703	,436*
		Sig.	0.606207	0.686093	0.685862	1	0.902616	0.181719	0.429346	0.272486	0.803581	0.618885	0.782536	0.62348	0.754735	0.0767668	0.828414	0.733726	0.249745	0.57257	0.033256
	Q21	τ	0.0414602	0.150863	-0.227609	-0.24906	-0.0663574	-0.206065	0.0513056	-0.171184	-0.107064	0.175195	0.0712639	0.128275	0.282259	-,429*	-0.00484274	-0.0433736	0.221315	0.0540673	-,392*	-,522**
		Sig.	0.819601	0.393988	0.221254	0.180479	0.704907	0.274132	0.76751	0.346431	0.545223	0.322227	0.684153	0.463813	0.109058	0.0204405	0.978153	0.80557	0.232741	0.760371	0.0408598	0.00562753
	Q22	τ	0.122224	-0.0730366	0.303507	-0.0348249	-0.203242	-0.0597028	-,365*	0.166305	-0.119989	-0.156507	,428*	-0.183347	0.146073	-0.0435102	,462*	0.191151	-0.0867981	0.0632289	-0.0131397	-,460*	0.154615
		Sig.	0.508932	0.685132	0.109096	0.854047	0.254403	0.755624	0.0387668	0.368853	0.505329	0.384921	0.0164134	0.30354	0.415169	0.817373	0.0102562	0.286481	0.645694	0.726003	0.946353	0.0165222	0.38993
	Q23	τ	-0.301425	0.0617557	0.0176117	0.0916097	0.170418	-0.200243	-0.0147968	-0.0622274	0.0823409	0.272754	-0.135649	0.195938	0.0720483	-0.269791	-0.128028	0.234432	0.342494	0.067571	-0.311086	-,405*	0.152522	0.0763014
		Sig.	0.0998782	0.729117	0.925169	0.624944	0.334412	0.291628	0.932562	0.734114	0.644273	0.126143	0.442183	0.266746	0.684779	0.148041	0.472448	0.18671	0.0668576	0.705214	0.107527	0.0331158	0.391633	0.673708
	Q24	τ	0.106505	0.170019	,496**	-0.155777	0.160721	,521**	-,489**	0.20888	-0.345039	0.260029	0.156217	0.317315	-0.00500056	-0.238319	,388*	0.272361	0.0277329	-0.26768	0.327465	-0.00595798	0.0148203	0.227717	-0.240308
		Sig.	0.561881	0.341503	0.00827813	0.406917	0.363745	0.00621638	0.00528271	0.255332	0.0535601	0.145731	0.377235	0.0727451	0.977574	0.20239	0.0297636	0.1259	0.882304	0.134879	0.0909947	0.975034	0.933813	0.209937	0.181409
	Q25	τ	0.0310207	,485**	0.221526	-,383*	0.179682	0.316691	-0.0884065	0.341548	-,456**	0.00970977	-0.0473955	0.137447	0.043694	-0.0231376	-0.033818	0.187502	0.360794	-,603**	0.269014	0.109904	-0.0143885	-0.087405	0.0659347	0.0443544
		Sig.	0.864287	0.00600223	0.233063	0.0388604	0.304352	0.0922741	0.609873	0.0598775	0.00980021	0.956176	0.786392	0.431715	0.803771	0.900353	0.848097	0.286497	0.0513358	0.000654737	0.160049	0.559159	0.934993	0.626378	0.710679	0.803391
	Q26	τ	-0.0261016	-0.181375	-0.0279596	0.0545382	-0.138457	0.0280496	0.155039	-,383*	0.215689	-0.0147061	0.0909257	0.0669979	-,490**	0.30955	-0.229268	-0.315538	0.0543727	-0.0346573	0.12964	0.239463	-0.232452	-0.181699	-0.245815	0.104498	-0.106285
		Sig.	0.885115	0.302412	0.879803	0.767883	0.426524	0.880911	0.368666	0.0342059	0.220055	0.933361	0.601457	0.700211	0.00510206	0.0923584	0.192021	0.0715503	0.767956	0.844033	0.496352	0.20102	0.185564	0.309271	0.164718	0.555673	0.544318
	Q27	τ	,412*	0.161767	0.212493	-0.0872612	0.0572925	0.185128	-,512**	0.183209	0.0392162	0.0196081	,383*	0.0574268	0.205885	-0.0525651	,663**	0.150487	-0.125057	-0.0148531	0.0185199	-0.239463	0.227609	,561**	-0.035848	,398*	-0.135272	-0.0731707
		Sig.	0.0234123	0.3611	0.253861	0.639179	0.743891	0.326264	0.00319404	0.314008	0.824782	0.911855	0.0289877	0.743139	0.242848	0.776594	0.000178	0.393481	0.500469	0.93328	0.923143	0.204279	0.198074	0.00183885	0.840558	0.0258175	0.443564	0.67714
	Q28	τ	0.0413609	-,495**	-0.127377	0.307879	-0.174953	-0.183347	,368*	-0.330875	0.291293	-0.247599	0.20854	-,398*	-0.339842	0.352849	-0.314024	-,524**	-0.113085	0.166717	-0.0305697	-0.0694129	-0.201439	0.102829	-0.0608628	-0.34005	-0.205742	,464**	-0.111116
		Sig.	0.818813	0.00484714	0.49066	0.0955184	0.314779	0.327205	0.0329709	0.0669026	0.0975051	0.15898	0.230719	0.0220726	0.0520808	0.0549257	0.0738089	0.00275188	0.539247	0.343712	0.872499	0.710767	0.251066	0.564819	0.730716	0.0550433	0.240309	0.00783196	0.526992
	Q29	τ	-0.295266	0.0732392	-0.0179029	0.104765	0.147759	0.0898027	0.0150414	0.0517549	-0.188329	0.261569	-0.0306426	,643**	-0.0209255	-,449*	0.0468521	0.248668	0.0348155	-0.0634043	-0.243759	0	0.149875	-0.132964	0.0874434	,430*	-0.0928032	0.00520579	0.0780869	-,464**
		Sig.	0.110808	0.684501	0.924752	0.580237	0.407643	0.639904	0.932173	0.779882	0.296094	0.146731	0.863624	0.000307747	0.907137	0.0173011	0.794755	0.165843	0.853786	0.725446	0.212238	1	0.404931	0.467884	0.629638	0.0179477	0.605463	0.976776	0.664602	0.00942788
	Q30	τ	0.292889	-0.210024	-0.068452	0.344935	-0.321443	0.200295	0.0766815	0.0769556	0.235026	-0.0300034	0.21968	0.117162	-0.150017	0.107244	0.0199044	-0.188176	-0.183037	0.106062	0.157435	,381*	-0.192664	-0.0741405	-,575**	0.187817	-0.231628	,353*	0.154259	0.093637	0.148692
		Sig.	0.109818	0.238857	0.715038	0.065642	0.068626	0.291453	0.660964	0.674416	0.187481	0.866376	0.213239	0.506593	0.397918	0.56526	0.911049	0.289161	0.327331	0.552617	0.415312	0.0446634	0.27915	0.682405	0.00135752	0.296198	0.192485	0.0458114	0.3866	0.596414	0.41216
	Q31	τ	-0.30654	-0.0645179	-0.169842	-0.0607373	0.0193347	-0.136311	0.261608	-0.349149	0.109184	0.317627	-0.324616	0.198646	-0.138962	0	-,642**	-0.108124	,402*	0.165414	-0.1625	-0.0709575	0.161796	-,510**	,358*	-0.206555	0.0684762	0.251871	-,469**	0.0978232	0.142302	-0.17129
		Sig.	0.0939906	0.717293	0.364664	0.745655	0.912725	0.47248	0.134311	0.0564801	0.540042	0.0746603	0.0656859	0.259813	0.433278	1	0.000311009	0.542214	0.0313983	0.354029	0.400132	0.708482	0.3631	0.00486739	0.0459606	0.250291	0.699828	0.15423	0.00841076	0.579836	0.432215	0.339242
	Q32	τ	-,383*	0.20197	0.0730522	0.0164419	0.00959567	-0.124025	-0.0755398	-0.0379049	-0.133005	,360*	-0.0625181	0.317399	-0.0492611	-0.264117	-0.117648	0.31221	,525**	-0.00497537	-0.223331	-0.311071	0.102197	0.052169	,767**	0.0500056	0.0970977	-0.0539222	-0.0441182	-0.223325	0.345271	-,390*	,387*
		Sig.	0.0358086	0.25546	0.695648	0.929797	0.956479	0.511908	0.664462	0.835426	0.45393	0.0428933	0.722115	0.0708627	0.780484	0.155054	0.507368	0.0774619	0.00482741	0.977688	0.245961	0.100058	0.564382	0.772527	1.77276e-05	0.780065	0.583353	0.759592	0.803668	0.20479	0.0558876	0.0290148	0.0301312
